# Supplementary material for: PENGEMBANGAN MODEL PENILAIAN BERBASIS TAKSONOMI SOLO PADA KONSEP PEMBAGIAN PECAHAN SEKOLAH DASAR
Source: Royal Society of Chemistry journal article supplement (doi:10.1039/c9dt03260f), 2014-12-02
Supplement: c9dt03260f1.pdf [file c9dt03260f1.pdf]

## *Supporting Information*

### **One-Step Synthesis of Few-layer Nb<sub>2</sub>CT<sub>x</sub> MXene as Promising Anode Material for high-rate Lithium Ion Batteries**

Jiabao Zhao, Jing Wen, Lina Bai, Junpeng Xiao, Rudong Zheng, Xinyuan Shan, lu li, Hong Gao \*, Xitian Zhang

*Key Laboratory for Photonic and Electronic Bandgap Materials, Ministry of Education, School of Physics and Electronic Engineering, Harbin Normal University, Harbin 150025, People's Republic of China*

#### **Experimentation**

**Synthesis of the accordion-like m-Nb<sub>2</sub>CT<sub>x</sub>** : 0.5 g Nb<sub>2</sub>AlC powder, -200 mesh, were immersed in 40% aqueous hydrofluoric solution, HF, for 70 h at 60 °C under continuous stirring. Afterwards, the mixture was washed by centrifugal machine at 9000 rpm, through several cycles of ultrapure water until the supernatant reached a pH of approximately 5. The speed was reduced to 5000 rpm, but no suspension was found after centrifugation. So the precipitate was collected by vacuum filtration. Put Nb<sub>2</sub>CT<sub>x</sub> precipitation in the vacuum drying oven, drying at 60 °C for 12 h.

**Electrochemical testing** : The electrochemical performance of the f-Nb<sub>2</sub>CT<sub>x</sub> and m-Nb<sub>2</sub>CT<sub>x</sub> electrode were tested in the 2016 coin type cell configurations. The working electrode was prepared by mixing active materials with acetylene black and polyvinylidene fluoride at a weight ratio of 80:10:10 on copper foils, and a Li foil was

used as the counter electrode [1]. The electrolyte was 1 M  $\text{LiPF}_6$  in a mixture of ethylene carbonate/dimethyl carbonate/ethylmethyl carbonate (EC/DMC/EMC) solvent (volume ratio of EC/DMC/EMC = 1:1:1). Nickel foams were used as shims to help the current collectors contact with the cathode or the anode. The charge and discharge performance were conducted with a LAND-CT2001A test system at the room temperature. The cyclic voltammetry (CV) and the galvanostatic discharge/charge (GDC) were performed on an electrochemical workstation (Biologic VMP-3, France) under a potential window of 0.01-3.0 V.

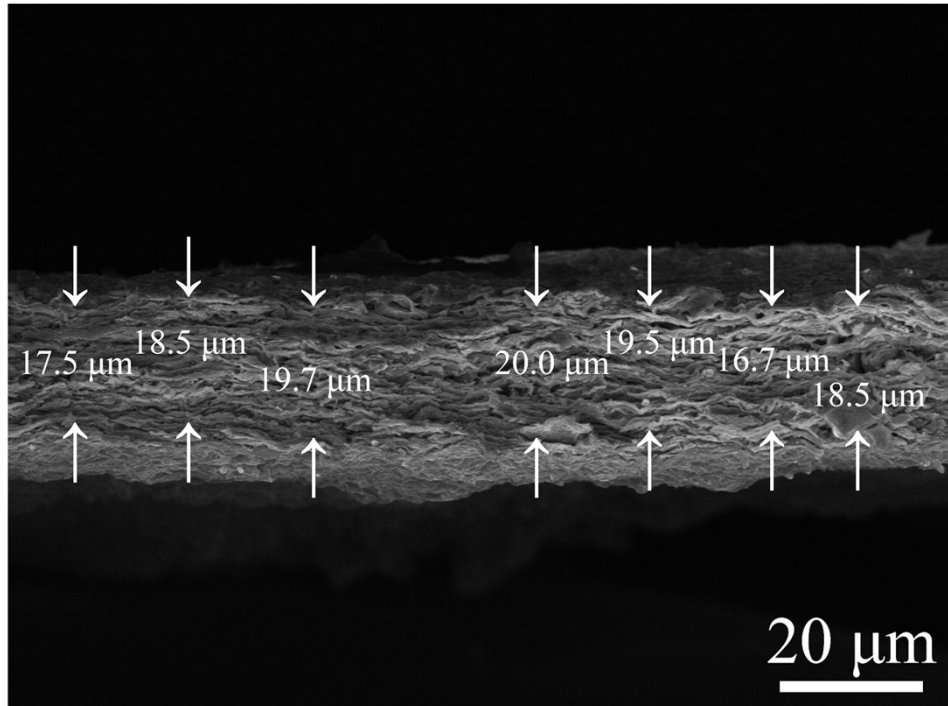

**Fig. S1** Measured thicknesses at different positions of the Nb<sub>2</sub>CT<sub>x</sub> film. The average thickness of the paper is calculated to be approximately 18.6 μm.

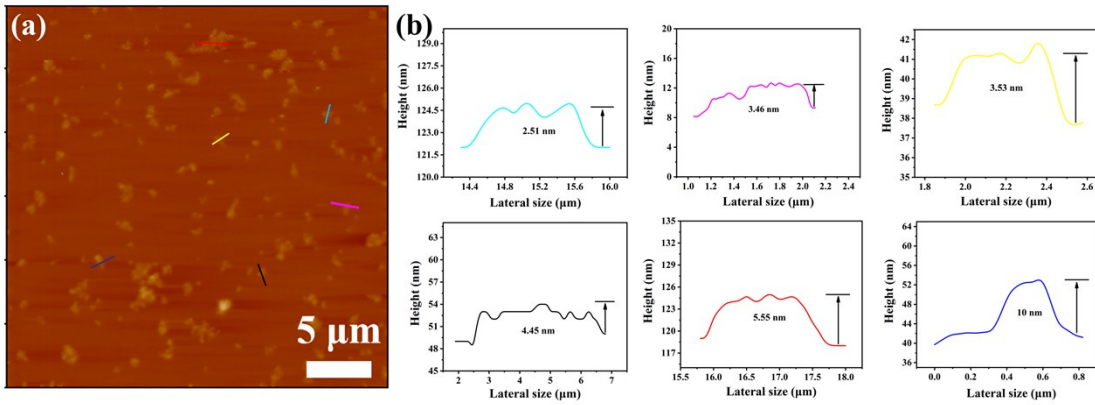

**Fig. S2** (a) AFM image of the  $f\text{-Nb}_2\text{CT}_x$ . (b) thicknesses of  $f\text{-Nb}_2\text{CT}_x$  nanosheets.

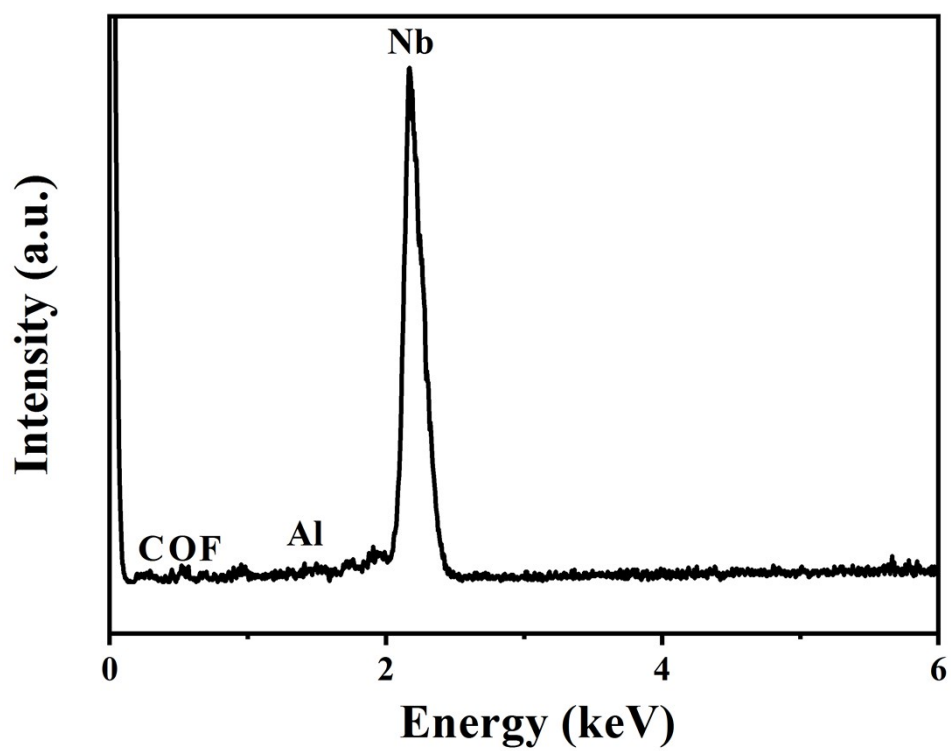

**Fig. S3** EDX spectrum of the  $\text{Nb}_2\text{CT}_x$  film is mainly composed of Nb, C, O, F and a small amount of Al elements.

**Table S1.** Composition content of Nb<sub>2</sub>CT<sub>x</sub> films. The Nb : C : O : F : Al atomic ratio determined by EDS were found to be 53.11 : 27.48 : 15.35 : 3.33 : 0.73.

| <b>Element</b> | <b>Weigh%</b> | <b>Atomic%</b> |
|----------------|---------------|----------------|
| <b>Nb (K)</b>  | 88.22         | 53.11          |
| <b>C (K)</b>   | 5.90          | 27.48          |
| <b>O (K)</b>   | 4.39          | 15.35          |
| <b>F (K)</b>   | 1.13          | 3.33           |
| <b>Al (K)</b>  | 0.35          | 0.73           |

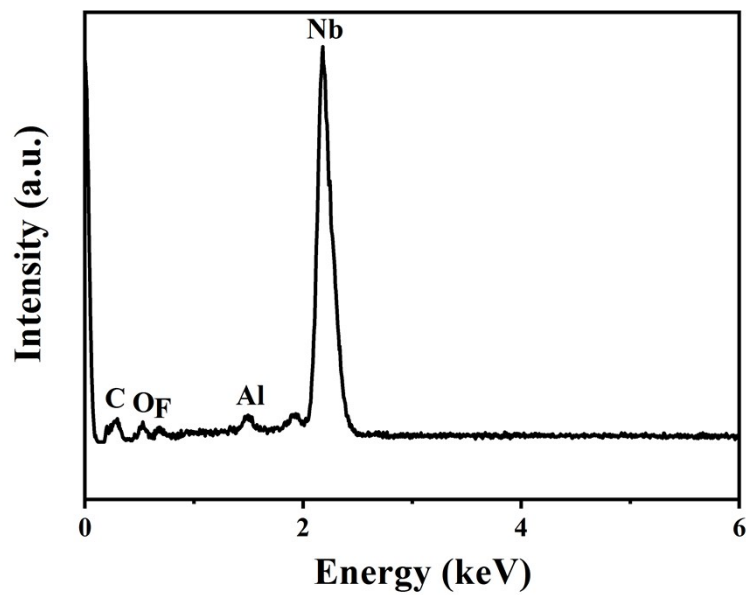

**Fig. S4** The Nb : C : O : F : Al atomic ratio determined by EDS were found to be 52.31 : 27.84 : 10.60 : 8.44 : 0.82 (m-Nb<sub>2</sub>CT<sub>x</sub>).

**Table S2.** XPS peak fitting results for Nb<sub>2</sub>C

| Region      | BE (eV) | Assigned to | Substance                           | Reference |
|-------------|---------|-------------|-------------------------------------|-----------|
| <b>C 1s</b> | 282.4   | C-Nb        | Nb <sub>2</sub> C                   | 2         |
|             | 284.8   | C-C         | C                                   | 3         |
|             | 286.4   | C-O         | Nb <sub>2</sub> C-O <sub>x</sub>    | 4         |
|             | 288.6   | C=O         |                                     | 5         |
| <b>O 1s</b> | 530.3   | Nb-O        | Nb <sub>2</sub> O <sub>5</sub>      | 2         |
|             | 530.9   | -O          | Nb <sub>2</sub> C-O <sub>x</sub>    | 6         |
|             | 532.2   | O-H         | Nb <sub>2</sub> C-(OH) <sub>x</sub> | 7, 8      |
|             | 533.5   | O-C=O       | C                                   | 7, 8      |
| <b>F 1s</b> | 684.6   | -F          | Nb <sub>2</sub> C-F <sub>x</sub>    | 9         |



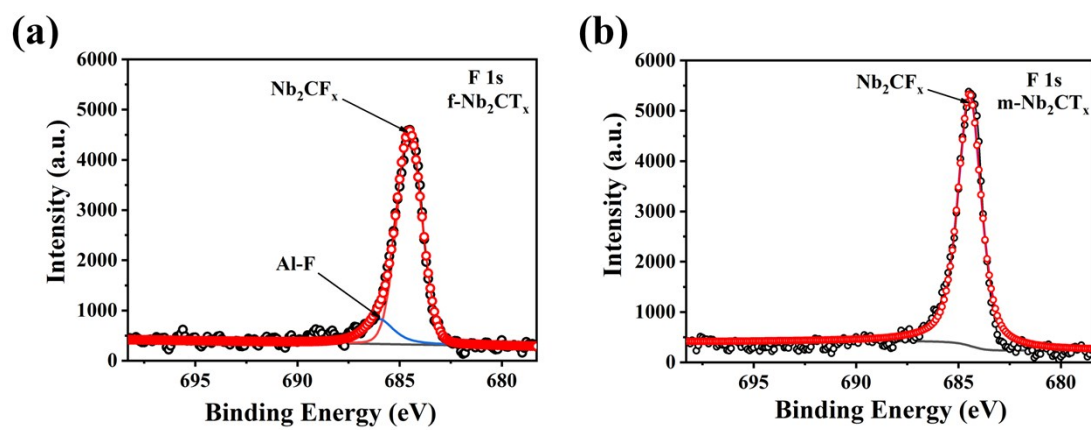

**Fig. S5** F 1s spectra of (a) f-Nb<sub>2</sub>CT<sub>x</sub> and (b) m-Nb<sub>2</sub>CT<sub>x</sub>

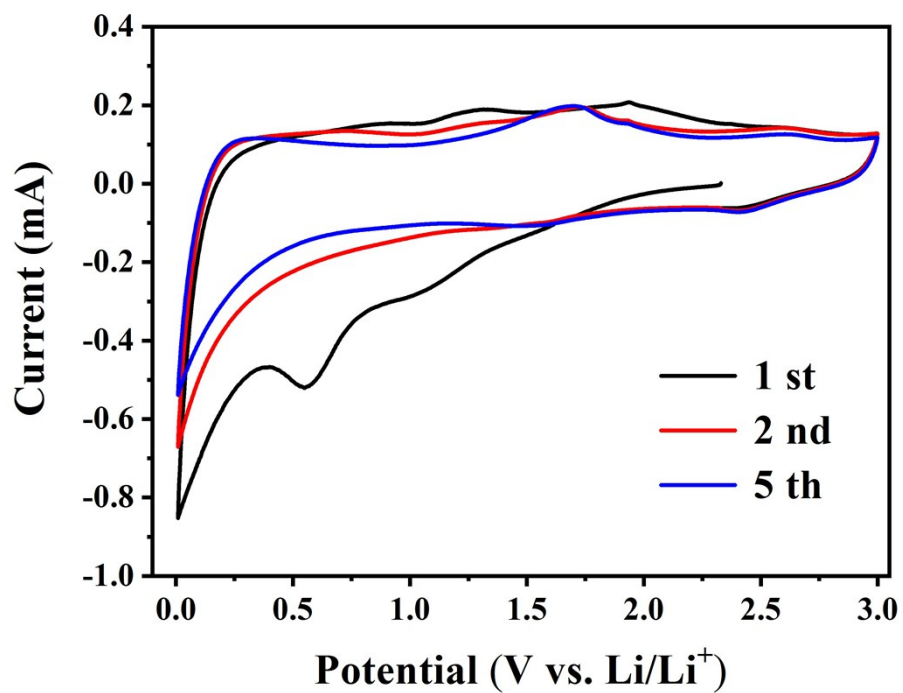

**Fig. S6** CV curves of the m-Nb<sub>2</sub>CT<sub>x</sub> electrode at a scanning rate of 0.5 mV s<sup>-1</sup>.

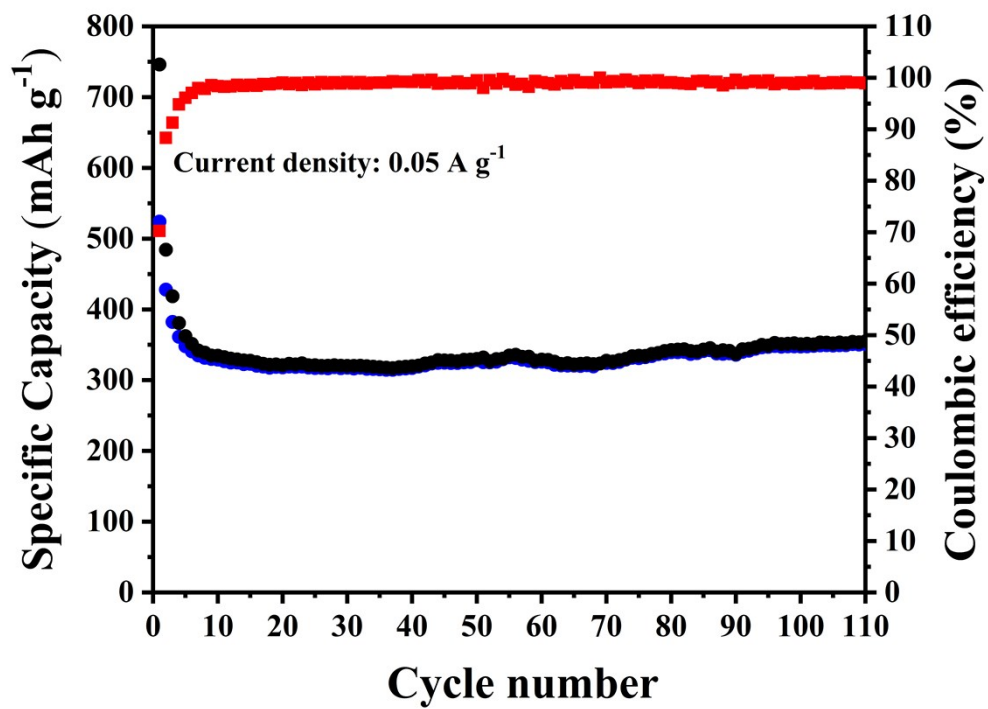

Fig. S7 Cycling performance of the f-Nb<sub>2</sub>CT<sub>x</sub> electrode at 0.05 A g<sup>-1</sup>.

The exposed surface area of the m-Nb<sub>2</sub>CT<sub>x</sub> and f-Nb<sub>2</sub>CT<sub>x</sub> were further investigated by N<sub>2</sub> sorption/desorption measurements. Fig. S8 shows the adsorption-desorption isotherm curve of m-Nb<sub>2</sub>CT<sub>x</sub> and f-Nb<sub>2</sub>CT<sub>x</sub>. The specific surface area of m-Nb<sub>2</sub>CT<sub>x</sub> is 14 m<sup>2</sup>/g by the BET method. However, the f-Nb<sub>2</sub>CT<sub>x</sub> possesses a bigger specific surface area of 38 m<sup>2</sup>/g, which is about 2.7 times larger than that of m-Nb<sub>2</sub>CT<sub>x</sub>. The high specific surface area is in favor of the exposure of active sites.

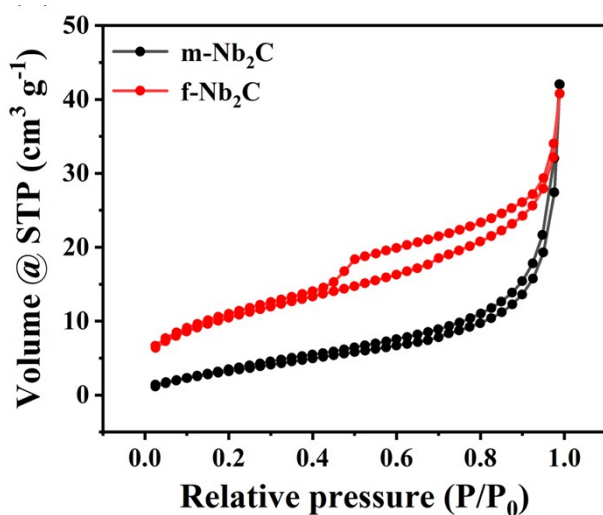

**Fig. S8** N<sub>2</sub> adsorption-desorption isotherms.

## References

- [1] S.P. Wu, R.Y. Ge, M.J. Lu, R. Xu, Z. Zhang, *Nano Energy*, 2015, 15, 379–405.
- [2] W.L. Zhang, J.M. Tian, H.B. Zeng, J.Q. Liu, Y. Tian, *Chemical Engineering Journal*, 2019, 366, 321–329.
- [3] L. Li, M.Y. Zhang, X.T. Zhang, Z.G. Zhang, *Journal of Power Sources*, 2017, 36, 4234–241.
- [4] D.X. Yang, A. Velamakanni, G. Bozoklu, S. Park, M. Stoller, R.D. Piner, R.S. Ruoff, *Carbon*, 2009, 47, 145–152.
- [5] Y.L. He, J.H. Li, K. Luo, L.F. Li, J.B. Chen, J.Y. Li, *Ind. Eng. Chem. Res.*, 2016, 55, 3775-3781.
- [6] J. Halim, S. Kota, M.R. Lukatskaya, Y. Gogotsi, *Advanced Functional Materials*, 2016, 26, 3118–3127.
- [7] H.R. Byon, B.M. Gallant, S. Woo, Y. Shao-Horn, *Advanced Functional Materials*, 2013, 23, 1037-1045.
- [8] S.H. Kundu, Y.M. Wang, W.Xia, M. Muhler, *J. Phys. Chem.*, 2008, 112, 16869-16878.
- [9] Y.D. Agnese, M.R. Lukatskaya, K.M. Cook, P.L. Taberna, Y. Gogotsi, P. Simon, *Electrochem. Commun.*, 2014, 48, 118-122.
